# Supplementary material for: SpliceCenter: A suite of web-based bioinformatic applications for evaluating the impact of alternative splicing on RT-PCR, RNAi, microarray, and peptide-based studies
Source: PubMed Central journal article supplement (PMC2491637; doi:10.1186/1471-2105-9-313), 2008-07-18

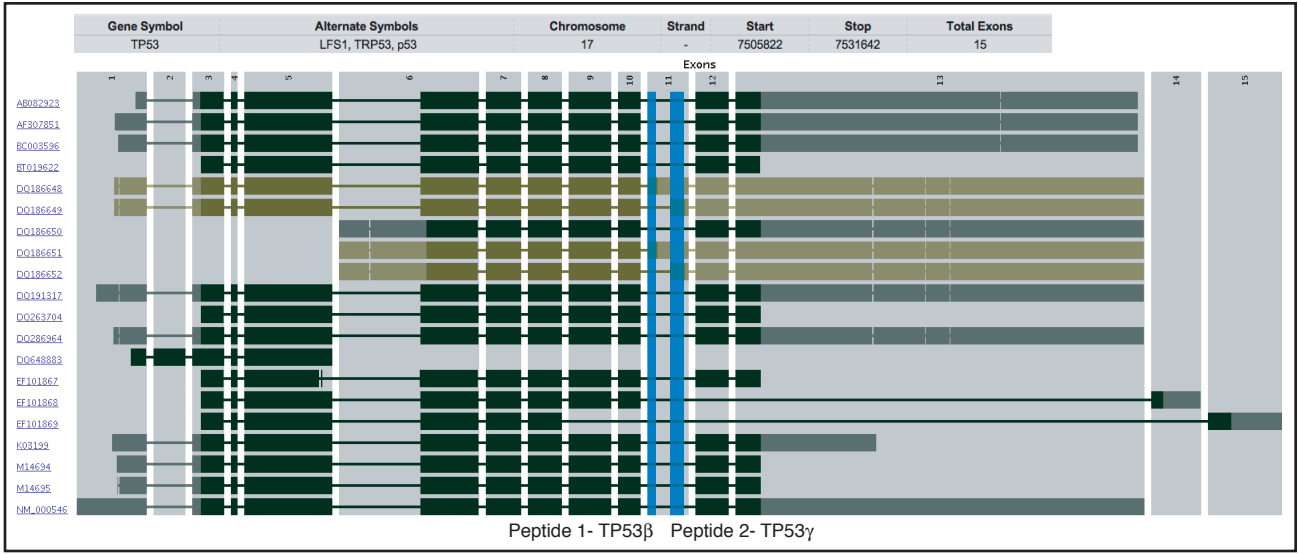

Supplement: 1471-2105-9-313-S3.pdf [file 1471-2105-9-313-S3.pdf]
